# Supplementary material
Source: PubMed Central journal article supplement (PMC4665083)
Supplement: jp5b08936_si_001.pdf [file jp5b08936_si_001.pdf]

# **The Role of Charge Transfer State on the Reduced Langevin Recombination in Organic Solar Cells: A Theoretical Study**

Yiming Liu<sup>1</sup>, Karin Zojer<sup>2\*</sup>, Benny Lassen<sup>1</sup>, Jakob Kjelstrup-Hansen<sup>1</sup>, Horst-Günter

Rubahn<sup>1</sup>, and Morten Madsen<sup>1\*</sup>

<sup>1</sup>*NanoSYD, Mads Clausen Institute, University of Southern Denmark, Alsion 2, DK-6400 Sønderborg, Denmark*

<sup>2</sup>*Institute of Solid State Physics, Graz University of Technology and NAWI Graz, Petersgasse 16, 8010 Graz, Austria*

---

\* Corresponding authors: Dr. Karin Zojer, [karin.zojer@tugraz.at](mailto:karin.zojer@tugraz.at); Assoc. Prof. Morten Madsen, [madsen@mci.sdu.dk](mailto:madsen@mci.sdu.dk)

### S.1 The derivation of the Langevin reduction factor from Hilczer's continuum method

According to the theory of Hilczer<sup>1</sup>, the Langevin reduction factor is given as:

$$\gamma = \frac{1}{1 - e^{-\frac{r_c}{R}} + \frac{Dr_c}{k_r R^3} e^{-\frac{r_c}{R}}} \quad (\text{Eq. A1})$$

where the Onsager radius  $r_c$  is defined as  $q^2/4\pi\epsilon kT$ ,  $R$  is the reaction radius,  $D$  is the sum of the diffusion coefficients of electrons and holes, and  $k_r$  is the rate with which a bound electron-hole pair ultimately recombines. In Ref. 1,  $R$  is assumed as 1 nm, and at room temperature  $r_c \approx 14$  nm when  $\epsilon=4$ ,  $D=5.2 \times 10^{-6}$  cm<sup>2</sup>/s. Guided by the fitting results of the  $\gamma$ - $T$  data of Deibel et al.<sup>2</sup>, the temperature range of 180~300 K implies  $\frac{Dr_c}{k_r R^3} e^{-\frac{r_c}{R}} \gg 1 \gg e^{-\frac{r_c}{R}}$ . Hence, Eq. A1 can be rewritten as:

$$\gamma \approx \frac{k_r R^3}{Dr_c} e^{\frac{q^2}{4\pi\epsilon R}/kT} \quad (\text{Eq. A2})$$

When considering  $\beta = 4\pi Dr_c$ ,  $N_0 = 1/R^3$ ,  $E'_b = \frac{q^2}{4\pi\epsilon R}$ , and formally assigning  $\tau_{CT} = 1/4\pi k_r$ , the Eq. A2 formally resembles Eq. 11 with  $\sigma_{CT}=0$  V.

It is important to note at this point, that  $\tau_{CT}$  is defined as the characteristic time with which CT states recombine to the ground state, rather than being the overall decay time (considering also a split of the bound electron-hole pair back into free carriers). Note further, that Hilczer and Tachiya assume that both the recombination rates as well as the diffusion coefficient are temperature-activated. Hence, the factor  $\frac{D}{k_r R}$  is set to  $A e^{-\Delta E/kT}$ , where  $\Delta E$  is the activation energy difference between  $D$  and  $k_r$ . Joining the exponential terms yields:

$$\gamma \approx \frac{R^2}{r_c A} e^{(E'_b + \Delta E)/kT} \quad (\text{Eq. A3})$$

where  $r_c$  in the prefactor is a markedly less dependent on temperature than the exponential term.

Eq. A3 is now assuming a form corresponding to Eq. 11 in this work. Now we can associate  $\tau_{CT} = R r_c A / \beta$ , indicating that  $\tau_{CT}$  itself is negatively temperature dependent. The fitting the  $\gamma$ - $T$  data of Ref. 1 gives  $\Delta E = -0.239$  eV for the data of Deibel et al.<sup>2</sup> The comparison between Eq. 11 and Eq. A3 implies that the binding energy  $E'_b = \frac{q^2}{4\pi\epsilon R}$  overestimates the CT state binding energy  $E_b$ .

## References

- (1) Hilczer, M.; Tachiya, M. Unified Theory of Geminate and Bulk Electron–Hole Recombination in Organic Solar Cells. *J. Phys. Chem. C* **2010**, *114*, 6808–6813.
- (2) Deibel, C.; Wagenpfahl, A.; Dyakonov, V. Origin of Reduced Polaron Recombination in Organic Semiconductor Devices. *Phys. Rev. B* **2009**, *80*, 075203.
